# Supplementary material for: Laboratory, Clinical, and Survival Outcomes Associated With Peptide Receptor Radionuclide Therapy in Patients With Gastroenteropancreatic Neuroendocrine Tumors
Source: PubMed Central journal article supplement (PMC7988364; doi:10.1001/jamanetworkopen.2021.2274), 2021-03-23
Supplement: jamanetwopen-e212274-s001.pdf [file jamanetwopen-e212274-s001.pdf]

## Supplemental Online Content

Kipnis ST, Hung M, Kumar S, et al. Laboratory, clinical, and survival outcomes associated with peptide receptor radionuclide therapy in patients with gastroenteropancreatic neuroendocrine tumors. *JAMA Netw Open*. 2021;4(3):e212274. doi:10.1001/jamanetworkopen.2021.2274

**eAppendix.** Laboratory Measured Toxic Effects Per Common Terminology Criteria for Adverse Events Version 5.0

**eTable 1.** Univariable Analysis of Factors Associated With Progression Among Patients With Reviewable Imaging After Treatment

**eTable 2.** Univariable Analysis of Factors Associated With Survival After Treatment

**eFigure.** Overall Survival After Treatment

This supplemental material has been provided by the authors to give readers additional information about their work.

**eAppendix.** Laboratory Measured Toxic Effects Per Common Terminology Criteria for Adverse Events Version 5.0<sup>1</sup>

Leukopenia, anemia, and thrombocytopenia were defined as the new development of a WBC count less than 3000/mm<sup>3</sup>, Hgb less than 10g/dL, and Plt count less than 75,000/mm<sup>3</sup> respectively. Nephrotoxicity was defined as the new development of an eGFR less than 60mL/min/1.73m<sup>2</sup>. Biochemical liver injury was defined as the new development of a total bilirubin greater than 1.5x the upper limit of normal, AST greater than 3x the upper limit of normal, or ALT greater than 3x the upper limit of normal.

Grade 3/4 toxicities were defined as WBC count less than 2000/mm<sup>3</sup>, Hgb less than 8g/dL, and Plt count less than 50,000/mm<sup>3</sup> respectively. Grade 3/4 nephrotoxicity was defined as the new development of an eGFR less than 30mL/min/1.73m<sup>2</sup>. Grade 3/4 biochemical liver injury was defined as the new development of a total bilirubin greater than 3x the upper limit of normal, AST greater than 5x the upper limit of normal, or ALT greater than 5x the upper limit of normal.

**eTable 1.** Univariable Analysis of Factors Associated With Progression Among Patients With Reviewable Imaging After Treatment

|                                         | HR (95% CI)       | P-value         |
|-----------------------------------------|-------------------|-----------------|
| Age at diagnosis (years), median (IQR)  | 1.01 (0.97-1.05)  | 0.58            |
| Age at first PRRT (years), median (IQR) | 0.99 (0.95-1.03)  | 0.68            |
| Male sex                                | 0.82 (0.37-1.82)  | 0.63            |
| NET primary location                    |                   |                 |
| Pancreas                                | REFERENCE         |                 |
| Small bowel                             | 0.21 (0.07-0.59)  | <b>&lt;0.01</b> |
| Other/unknown                           | 0.58 (0.24-1.43)  | 0.24            |
| Grade of NET                            |                   |                 |
| 1                                       | REFERENCE         |                 |
| 2                                       | 1.22 (0.44-3.36)  | 0.70            |
| 3                                       | 3.07 (0.86-11.00) | 0.09            |
| Systemic therapy prior to PRRT          | 1.09 (0.49-2.44)  | 0.83            |
| Liver-directed therapy prior to PRRT    | 0.71 (0.32-1.58)  | 0.40            |
| Hepatic resection                       | 1.02 (0.42-2.45)  | 0.97            |
| Radiofrequency ablation                 | 0.73 (0.10-5.44)  | 0.76            |
| Bland embolization                      | 0.76 (0.22-2.55)  | 0.65            |
| TACE                                    | 0.70 (0.24-2.07)  | 0.52            |
| TARE                                    | 0.91 (0.31-2.67)  | 0.87            |
| Prior resection of primary              | 0.76 (0.32-1.79)  | 0.53            |

**eTable 2: Univariable Analysis of Factors Associated With Survival After Treatment**

|                                         | HR (95% CI)       | P-value     |
|-----------------------------------------|-------------------|-------------|
| Age at diagnosis (years), median (IQR)  | 1.08 (1.01-1.16)  | <b>0.02</b> |
| Age at first PRRT (years), median (IQR) | 1.07 (0.99-1.15)  | 0.10        |
| Male sex                                | 1.96 (0.49-7.85)  | 0.34        |
| NET primary location                    |                   |             |
| Pancreas                                | REFERENCE         |             |
| Small bowel                             | 1.25 (0.11-13.78) | 0.86        |
| Other/unknown                           | 6.39 (0.77-53.19) | 0.09        |
| Grade of NET                            |                   |             |
| 1                                       | REFERENCE         |             |
| 2                                       | 1.47 (0.27-8.01)  | 0.66        |
| 3                                       | 1.58 (0.14-17.43) | 0.71        |
| Systemic therapy prior to PRRT          | +                 | 1.00        |
| Liver-directed therapy prior to PRRT    |                   |             |
| Hepatic resection                       | 0.33 (0.04-2.67)  | 0.30        |
| Radiofrequency ablation                 | 1.38 (0.17-11.04) | 0.76        |
| Bland embolization                      | 1.58 (0.33-7.64)  | 0.57        |
| TACE                                    | 0.44 (0.05-3.51)  | 0.44        |
| TARE                                    | 0.64 (0.08-5.10)  | 0.67        |
| Prior resection of primary              | 0.48 (0.13-1.79)  | 0.27        |

**eFigure.** Overall Survival After Treatment  
OS for the entire cohort of individuals with metastatic NETs who underwent PRRT.

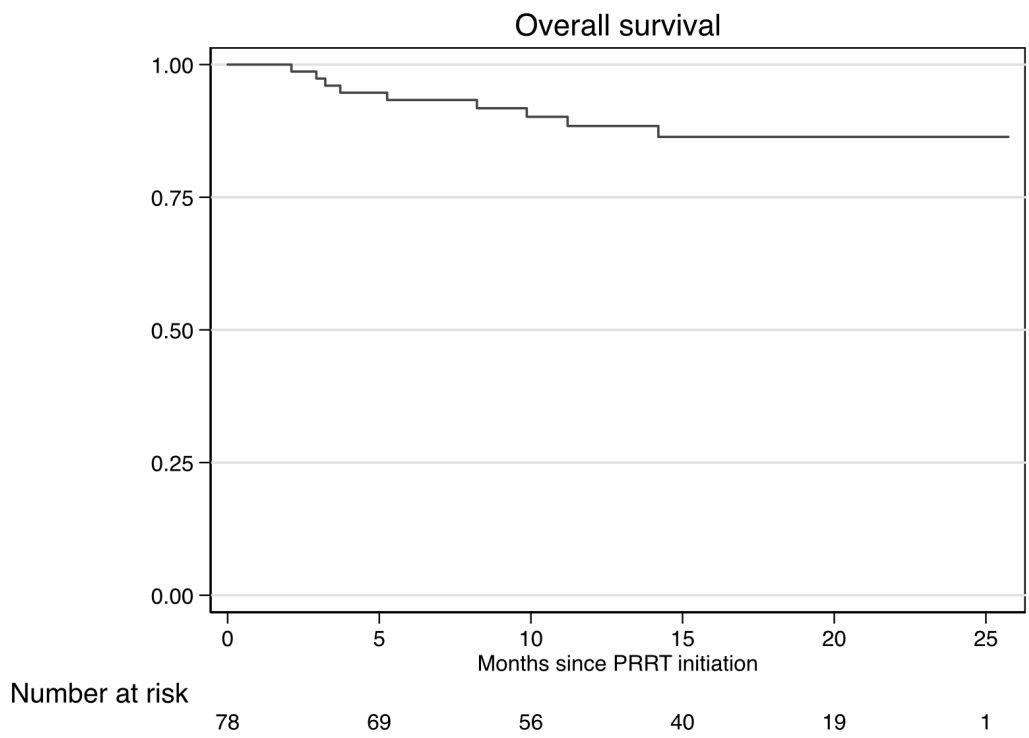

## Supplemental Content References

1. Common Terminology Criteria for Adverse Events (CTCAE) Version 5.0.

November 27, 2017. Accessed October 12, 2020.

[https://ctep.cancer.gov/protocolDevelopment/electronic\\_applications/ctc.htm](https://ctep.cancer.gov/protocolDevelopment/electronic_applications/ctc.htm) - ctc\_50
